# 1 Whole genome sequencing reveals high 2 complexity of copy number variation at 3 insecticide resistance loci in malaria 4 mosquitoes

5 Eric R. Lucas<sup>1§</sup>, Alistair Miles<sup>2,3</sup>, Nicholas J. Harding<sup>3</sup>, Chris S. Clarkson<sup>2</sup>, Mara K.  
6 N. Lawniczak<sup>2</sup>, Dominic P. Kwiatkowski<sup>2,3</sup>, David Weetman<sup>1</sup>, Martin J. Donnelly<sup>1,2</sup>  
7 and The *Anopheles gambiae* 1000 Genomes Consortium<sup>4</sup>

8 <sup>1</sup>Liverpool School of Tropical Medicine, Pembroke Place, Liverpool L3 5QA, UK.

9 <sup>2</sup>Wellcome Sanger Institute, Hinxton, Cambridge CB10 1SA, UK.

10 <sup>3</sup>Big Data Institute, University of Oxford, Li Ka Shing Centre for Health  
11 Information and Discovery, Old Road Campus, Oxford OX3 7LF, UK.

12 <sup>4</sup><https://www.malariagen.net/projects/ag1000g#people>

13 § Author for correspondence: [eric.lucas@lstmed.ac.uk](mailto:eric.lucas@lstmed.ac.uk)

14 Keywords: CNV, gene duplication, metabolic insecticide resistance, *Anopheles*,  
15 whole genome sequencing, Ag1000G

16 **Abstract**

17 **Background:**

18 Polymorphisms in the copy number of a genetic region can influence gene expression, coding  
19 sequence and zygosity, making them powerful actors in the evolutionary process. Copy number  
20 variants (CNVs) are however understudied, being more difficult to detect than single nucleotide  
21 polymorphisms. We take advantage of the intense selective pressures on the major malaria vector  
22 *Anopheles gambiae*, caused by the widespread use of insecticides for malaria control, to investigate  
23 the role of CNVs in the evolution of insecticide resistance.

24 **Results:**

25 Using the whole-genome sequencing data from 1142 samples in the *An. gambiae* 1000 genomes  
26 project, we identified 1557 independent increases in copy number, encompassing a total of 267  
27 genes, which were enriched for gene families linked to metabolic insecticide resistance. The five  
28 major candidate genes for metabolic resistance were all found in at least one CNV, and were often  
29 the target of multiple independent CNVs, reaching as many as 16 CNVs in *Cyp9k1*. These CNVs  
30 have furthermore been spreading due to positive selection, indicated by high local CNV frequencies  
31 and extended haplotype homozygosity.

32 **Conclusions:**

33 Our results demonstrate the importance of CNVs in the response to selection, with CNVs being  
34 closely associated with genes involved in the evolution of resistance to insecticides, highlighting the  
35 urgent need to identify their relative contributions to resistance and to track their spread as the  
36 application of insecticide in malaria endemic countries intensifies. Our detailed descriptions of  
37 CNVs found across the species range provides the tools to do so.

## 38 **1 Introduction**

39 Copy number variants (CNVs) are a form of genetic variation that occur when a genomic sequence  
40 is deleted or duplicated, potentially affecting both the structure and expression levels of coding  
41 sequences and playing a crucial role in evolution and adaptation [1-3]. Part of the importance of  
42 CNVs lies in the wide range of effects that they can have on the transcriptome. Increases in copy  
43 number (amplifications) encompassing the entire sequence of a gene can lead to elevated expression  
44 levels if new gene copies are associated with cis-regulatory sequences required for transcription [4].  
45 Alternatively, duplication or deletion of only part of a gene's sequence can lead to structural  
46 variation. For example, in humans, a CNV spanning parts of two glycoporphin genes creates a novel  
47 hybrid glycoporphin associated with resistance to malaria [5]. CNVs can also allow alternative  
48 variants of a gene to appear in tandem on the same chromosome through heterogeneous gene  
49 duplication, creating constitutive heterozygotes. This can be seen in the mosquitoes *Anopheles*  
50 *gambiae* and *Culex pipiens*, where mutations in Acetylcholinesterase-1 (*Ace-1*) cause resistance to  
51 carbamate and organophosphate insecticides, but carry a fitness cost in the absence of insecticide.  
52 This cost is mitigated in heterozygotes, leading to the spread of heterogeneous *Ace-1* duplications in  
53 which the mutant and wild-type alleles co-occur [6,7].

54 While the importance of CNVs is widely recognised, they typically receive less attention than  
55 single nucleotide polymorphisms (SNPs) in investigations of genetic variation, perhaps because  
56 they are more difficult to identify. Population-level genome-wide analyses of CNVs are thus rare  
57 and the extent of their impact on evolution is poorly understood (but see [8] for a worldwide study  
58 in humans).

59 The malaria mosquito *An. gambiae* and its close sister species *An. coluzzii* provide excellent models  
60 to study the evolution of CNVs at a population level for three reasons. First, these species are the  
61 major vectors of malaria in Sub-Saharan Africa (SSA) and are highly anthropophilic [9]. As a  
62 consequence, they are heavily targeted by insecticides used in malaria control programmes, creating  
63 intense selective pressures that drive rapid contemporary evolution. CNVs thus have an opportunity  
64 to contribute to the selective response to these pressures, providing a context in which their  
65 importance can be assessed. Second, CNVs can play a key role in the evolution of insecticide  
66 resistance due to their ability to affect gene expression and allow co-expression of wild-type and  
67 mutant alleles [10,11]. Despite nearly two decades of genetic research into insecticide resistance,  
68 known resistance-associated SNPs are still unable to explain much of the variance in insecticide  
69 resistance [12]. CNVs potentially represent a crucial source of missing variation that can fill this

70 gap. Third, the *Anopheles gambiae* 1000 Genomes project (Ag1000G) has produced whole-genome  
71 sequencing data from 1142 individual *An. gambiae* and *An. coluzzii* from multiple locations in SSA,  
72 providing a unique opportunity to conduct genome-wide searches for CNVs from across the species'  
73 distributions [13].

74 The two major mechanisms of insecticide resistance are target site resistance and metabolic  
75 resistance [14]. CNVs have been found to affect all three major insecticide target site genes in  
76 insects (*Ace-1*: [6,15]; the *para* voltage-gated sodium channel (*Vgsc*): [16,17]; gamma-  
77 aminobutyric acid (GABA) receptor: [18]), usually combining resistant and wild-type alleles to  
78 provide resistance while mitigating its cost. However, duplications in *Ace-1* are the only CNVs so  
79 far shown to play a role in *Anopheles* insecticide resistance, being associated with a resistance-  
80 conferring mutation and either increasing the resistance which it confers [19] or diminishing the  
81 fitness cost of the mutation [6].

82 Metabolic genes whose expression levels are associated with insecticide resistance have been  
83 reported in a wide range of species [20], but the causative genetic variants often remain  
84 unidentified. Focused studies have identified cases where CNVs play a critical role in metabolic  
85 insecticide resistance in a range of species. In *Drosophila*, duplication of the detoxification gene  
86 *Cyp6g1* has been implicated in resistance to DDT [21], while in *Cx. quinquefasciatus* resistance to  
87 permethrin is associated with increased expression of *Cyp9m10*, due in part to a duplication [22]  
88 Similarly, amplification of esterase genes leading to elevated expression provides increased  
89 resistance to organophosphates in the mosquitoes *Cx. pipiens* [23] and *Aedes albopictus* [24], and to  
90 several insecticides in the peach-potato aphid *Myzus persicae* [25,26]. In brown planthoppers,  
91 neofunctionalisation of a duplicated copy of *Cyp6er1* has even created a novel gene variant  
92 providing resistance to the neonicotinoid imidacloprid [27]. In *An. gambiae* and *An. coluzzii*, the  
93 most important metabolic genes that have been identified as major insecticide resistance candidates to  
94 date are *Gste2* [28], *Cyp6p3* [29,30], *Cyp6m2* [29,31,32], *Cyp6z1* [33] and *Cyp9k1* [34,35]. If  
95 CNVs play an important role in the evolution of insecticide resistance in *An. gambiae* and *An.*  
96 *coluzzii*, we would expect to find them among genes such as these.

97 Here, we use the whole-genome sequencing data resources of the Ag1000G project to perform an  
98 agnostic genome-wide scan of CNVs in *An. gambiae* and *An. coluzzii*. We find that CNVs are  
99 enriched for genes and gene families implicated in insecticide resistance, with many independent  
100 CNV events encompassing the five key metabolic resistance-associated genes (*Gste2*, *Cyp6p3*,  
101 *Cyp6m2*, *Cyp6z1* and *Cyp9k1*). Further investigation into these genes reveals that several CNVs  
102 exist at high local frequencies and show clear evidence of strong positive selection.

## 103 2 Results

104 We found a total of 1557 independent CNVs in the Ag1000G phase 2 dataset using sequencing  
105 coverage data (Supplementary Data S1); 250 of these CNVs contained at least one gene,  
106 significantly more than expected by chance ( $P < 0.0001$ , null distribution determined by  
107 simulation). Out of 10,939 genes included in the analysis, 267 (2.4%) were found in at least one  
108 CNV (Supplementary Data S2). As expected, these included the well-documented duplication in the  
109 insecticide target site *Ace-1*. No CNVs were found in the other common insecticide target sites *Vgsc*  
110 or *GABA*.

### 111 2.1 CNVs are enriched for potential metabolic resistance 112 genes.

113 Of the 267 genes found in CNVs (Supplementary Data S2), 28 were candidate metabolic resistance  
114 genes (defined as a cytochrome P450, glutathione-S-transferase or carboxylesterase, and referred to  
115 as “metabolic detox genes” from here on). Because many related genes occur in clusters, and are  
116 therefore not independently included in CNV events, we counted the number of CNVs that included  
117 at least one metabolic detox gene. Of the 250 CNVs that contained any genes, 27 contained at least  
118 one metabolic detox gene, significantly more than expected by chance ( $P < 0.0001$ , null distribution  
119 determined by simulation). While there was some variation between populations in the number of  
120 metabolic detox genes found in CNVs (Table 1), this was not significant (Fisher's exact test:  $P =$   
121 0.08).

122 Analysis of Gene Ontology (GO) terms for genes encompassed by CNVs showed enrichment for  
123 cytochrome P450s. Genes found in CNVs were enriched for 13 molecular function GO terms after  
124 multiple correction to a  $Q$ -value threshold of 0.05 (Supplementary Data S3), primarily reflecting an  
125 enrichment for two classes of genes: cytochrome P450s (significant GO terms included  
126 monooxygenase activity, heme binding, iron ion binding, oxidoreductase activity) and proteases  
127 (significant GO terms included several forms of peptidase activity). No GO terms from biological  
128 process or cellular compartment ontologies were significantly enriched.

129 The 28 detox genes found inside CNVs were predominantly ones that have previously been  
130 implicated in insecticide resistance (Table 2, Supplementary Data S2), including the Glutathione S-  
131 Transferase Epsilon (*Gste*) cluster and several Cytochrome P450s (*Cyp9k1*, *Cyp6m2*, *Cyp6z1*, and  
132 *Cyp6p3*). This again indicates that genes involved in metabolic insecticide resistance have been the  
133 focus of amplification events. We therefore performed a detailed analysis of the CNVs in the gene  
134 clusters containing *Cyp6p3* (chromosome 2R), *Gste2* (chromosome 3R), *Cyp6m2* (chromosome

135 3R), *Cyp6z1* (chromosome 3R) and *Cyp9k1* (chromosome X) (Fig. 1a). Since the *Cyp6aa1* /  
136 *Cyp6aa2* genes, which are adjacent to the *Cyp6p* cluster, were also highly represented in the list of  
137 amplified genes (Supplementary Data S2), we extended the study region around *Cyp6p3* to include  
138 these genes.

139 Using discordant read pairs and reads aligning to CNV breakpoints, we found that three of the five  
140 gene clusters showed very high numbers of repeated, independent CNV events. We identified 16  
141 CNV alleles in *Cyp9k1* (named *Cyp9k1\_Dup1* - 16; Supplementary Data S7 & Supplementary Fig.  
142 S4), 15 in the *Cyp6aa1* - *Cyp6p2* cluster (*Cyp6aap\_Dup1* - 15; Fig. 1b, Supplementary Data S4 &  
143 Supplementary Fig. S1), 11 in the *Gstu4* - *Gste3* cluster (*Gstue\_Dup1* - 11; Fig. 1c, Supplementary  
144 Data S5 & Supplementary Fig. S2), one in *Cyp6m2* (*Cyp6m\_Dup1*; Supplementary Data S6 &  
145 Supplementary Fig. S3) and one in *Cyp6z3* - *Cyp6z1* (*Cyp6z\_Dup1*; Supplementary Data S6 &  
146 Supplementary Fig. S3). Many of these CNVs were found across multiple populations  
147 (Supplementary Data S8).

148 Several CNV alleles were found across different populations (for example, *Cyp6aap\_Dup7* was  
149 found in *An. coluzzii* from Burkina Faso, Côte d'Ivoire, Ghana and Guinea; Supplementary Data  
150 S4), although none were found in all populations of either species. Furthermore, multiple CNV  
151 alleles covering the same genes could be found in the same population (for example,  
152 *Cyp9k1\_Dup4*, *Dup11* and *Dup15* in *An. gambiae* from Burkina Faso; Supplementary Data S7).  
153 This resulted in some genes being amplified at very high frequency in certain populations (Table 3).  
154 In particular, over 92% of individuals had a CNV in *Cyp9k1* in *An. gambiae* from Burkina Faso, and  
155 90% of individuals had a CNV covering all genes in the *Cyp6p* cluster in *An. coluzzii* from Côte  
156 d'Ivoire.

## 157 **2.2 CNVs in metabolic resistance genes are under positive** 158 **selection**

159 Several CNV alleles were found at high local frequencies (Supplementary Data S8), suggesting that  
160 they are likely to be under positive selection. To investigate this possibility, we phased the CNV  
161 genotype calls onto the Ag1000G phase 2 haplotype scaffold and calculated extended haplotype  
162 heterozygosity (EHH) for the CNV alleles present in at least 5% of individuals in a population.

163 Rates of EHH decay around CNV alleles were consistently lower than for wild-type haplotypes  
164 (Fig. 2, S5, S7 and S9), supporting our contention that these alleles are reaching high frequency  
165 through positive selection. Furthermore, the median length of shared haplotypes was significantly  
166 higher between pairs of haplotypes carrying the same CNV allele than between wild-type

167 haplotypes from the same population (bootstrapped 95% confidence intervals for the medians did  
168 not overlap, Fig. 3, S6, S8 and S10).

169 Phasing of CNV genotype calls was only possible for simple duplications, where the zygosity of the  
170 CNV alleles could be determined from the copy number estimates. For CNV alleles with higher  
171 copy numbers (triplications and above), this was not possible, and thus the EHH decay could not be  
172 calculated. In the case of *Cyp9k1*, the CNV with the highest frequency (*Cyp9k1\_Dup11*, found in  
173 *An. gambiae* from Burkina Faso, Ghana and Guinea) could not be phased. We therefore investigated  
174 whether this CNV was associated, at the sample level, with haplotypes under selection. Hierarchical  
175 clustering of the haplotypes in these three populations revealed two large cross-population  
176 haplotype clusters around *Cyp9k1*, indicating selective sweeps (Fig. S11). Cluster 1 was very  
177 strongly associated with *Cyp9k1\_Dup11* in both males (Fisher's exact test,  $P < 0.0001$ ;  
178 Supplementary Table S1) and females (Spearman's rank correlation:  $\rho = 0.9$ ,  $P < 0.0001$ , Fig. 4a).  
179 Cluster 2 was associated with the presence of *Cyp9k1\_Dup15*, but the correlation was not as close  
180 as between Cluster 1 and *Cyp9k1\_Dup11* (Spearman's rank correlation:  $\rho = 0.65$ ,  $P < 0.0001$ , Fig.  
181 4b & Supplementary Table S2).

### 182 **2.3 A *Gste2* duplication in Burkina Faso is associated with the** 183 **resistance-conferring I114T mutation.**

184 Ten of the 11 CNV alleles found in the *Gstu4* - *Gste3* cluster included *Gste2* (Fig. 1), perhaps  
185 reflecting the known importance of this gene in insecticide resistance. The well-characterised I114T  
186 mutation in *Gste2* is known to confer DDT resistance [28], and could be associated with gene  
187 duplications in a similar fashion to other mutations such as the *Ace-1* G119S. We therefore  
188 investigated whether any of the CNV alleles in *Gste2* were associated with this mutation. 114T is  
189 present across Africa and in both *An. gambiae* and *An. coluzzii* [36], but was only associated with  
190 *Gstue\_Dup1* in our data. *Gstue\_Dup1* was found in 16 *An. coluzzii* samples from Burkina Faso, all  
191 of which were at least heterozygote for 114T (Supplementary Table S3). The presence of 114T  
192 homozygotes, together with the ratio of reads supporting the I114 and 114T alleles in heterozygotes  
193 (roughly 1:2), indicate that both copies of *Gste2* in the *Gstue\_Dup1* CNV carry the 114T mutation.

### 194 **2.4 *Cyp6aa1* is more strongly associated with CNVs than** 195 ***Cyp6p3***

196 Of the 15 CNV alleles found in the *Cyp6aa1* - *Cyp6p2* cluster, five included *Cyp6p3* but 13

197 included *Cyp6aa1* (Supplementary Data S4). *Cyp6p3* CNVs were found at high (> 50%) frequency  
198 in one population (Côte d'Ivoire *An. coluzzii*: 90%), while *Cyp6aa1* CNVs were found at high  
199 frequency in *An. coluzzii* from Burkina Faso (91%), Côte d'Ivoire (89%) and Guinea (75%), and in  
200 *An. gambiae* from Uganda (64%).

### 201 **3 Discussion**

202 Our study detected 1557 CNVs in *An. gambiae* and *An. coluzzii* and revealed a striking enrichment  
203 for gene families involved in metabolic insecticide resistance. These results mirror findings in  
204 *Drosophila melanogaster*, where cytochrome P450s were disproportionately represented in CNVs  
205 [37]. Similarly, in *Aedes aegypti*, cytochrome P450s were enriched among genes showing evidence  
206 of higher copy number in populations resistant to deltamethrin compared to susceptible populations  
207 [38]. Strikingly, the five metabolic genes most strongly associated with insecticide resistance in the  
208 literature for *An. gambiae* and *An. coluzzii*, and which have been shown to metabolise insecticides  
209 in vitro (*Gste2*, *Cyp6p3*, *Cyp6m2*, *Cyp6z1* and *Cyp9k1*), were all found to be amplified in at least  
210 one population in our dataset. Furthermore, three of these genes showed evidence of repeated  
211 independent CNV events within and between populations, with as many as 16 independent CNV  
212 alleles in *Cyp9k1*.

213 Expression of *Gste2* is higher in DDT resistant *An. gambiae* [39,40] and *An. funestus* [41] compared  
214 to susceptible mosquitoes, and transgenic expression of *An. gambiae* / *An. funestus* *Gste2* in  
215 *Drosophila* provides resistance to DDT [28,41]. Non-synonymous SNPs in *Gste2* have also been  
216 shown to be associated with resistance to DDT in both *An. gambiae* [28] and *An. funestus* [41]. In  
217 our study, *Gste2* was amplified in Kenya, in *An. coluzzii* from Angola, Burkina Faso and Ghana,  
218 and in *An. gambiae* from Gabon and Uganda.

219 *Cyp6p3* is up-regulated in mosquitoes resistant to pyrethroids, DDT and bendiocarb [29,30,42-45],  
220 metabolises permethrin and deltamethrin [30] and provides resistance to pyrethroids when  
221 expressed in *Drosophila* [29]. *Cyp6m2* is also up-regulated in mosquitoes with resistance to  
222 permethrin, DDT and bendiocarb [29,31,42,46], metabolises pyrethroids and DDT [31,32] and  
223 provides resistance to pyrethroids, DDT and bendiocarb when expressed in *Drosophila* [29]. In our  
224 study, *Cyp6p3* and *Cyp6m2* were found amplified primarily in *An. coluzzii* from Côte d'Ivoire.  
225 Interestingly, mosquitoes from the Côte d'Ivoire population that our samples were drawn from over-  
226 express both *Cyp6p3* and *Cyp6m2* compared to susceptible populations [29]. Particularly in the case  
227 of *Cyp6m2*, this over-expression is unlikely to be driven solely by CNVs, since the CNV frequency  
228 and copy number are not sufficient to explain the expression levels, but the selective pressure to up-



229 regulate these genes may have played a part in maintaining these CNVs in the population.

230 *Cyp6z1* was amplified in *An gambiae* from Burkina Faso and Guinea. *Cyp6z1* is up-regulated in  
231 mosquitoes with resistance to pyrethroids and DDT [39,47] and metabolises DDT and carbaryl [33].  
232 Finally, *Cyp9k1* was the most widely amplified gene of the five, with CNVs found in over half of  
233 the populations in our dataset. *Cyp9k1* is up-regulated in mosquitoes resistant to pyrethroids and  
234 DDT [44,45,48], and metabolises deltamethrin [35]. Furthermore, a selective sweep in the *Cyp9k1*  
235 region has been associated with insecticide resistance in *An. coluzzii* [34].

236 In-depth investigation of the CNVs around these five genes revealed strong evidence that they  
237 provide a selective advantage. First, some of the CNV alleles were found at high frequencies and  
238 across several populations. Second, the CNV alleles consistently showed evidence of being under  
239 positive selection as haplotype homozygosity was extended further for the CNVs than for wild-type  
240 haplotypes. Evidence for positive selection was also found in a CNV where the EHH score could  
241 not be calculated. *Cyp9k1\_Dup11*, which exists as both duplications and triplications and thus could  
242 not be phased onto a haplotype scaffold for homozygosity calculation, was consistently found in the  
243 same samples as the haplotype of a large selective sweep around *Cyp9k1* in *An. gambiae* from  
244 Burkina Faso, Guinea and Ghana, raising the strong possibility that this CNV is the focus of the  
245 selective sweep. It cannot be excluded that *Cyp9k1\_Dup11* is in linkage disequilibrium with  
246 another mutation that is driving the sweep. However, the high frequency of the triplicated version of  
247 *Cyp9k1\_Dup11* compared to the duplicated version, both of which are associated with the swept  
248 haplotype cluster, suggests that higher-order amplifications of *Cyp9k1* provide a selective  
249 advantage. The changes in allele frequencies in the different amplification levels in this CNV will  
250 need to be monitored to determine whether the triplication eventually replaces the duplication  
251 entirely.

252 We found multiple independent CNVs in three of the five gene regions, with 11 CNV alleles around  
253 *Gste2* (a gene cluster containing *Gste1-7* and *Gstu4*), 15 around *Cyp6p3* (a gene cluster including  
254 *Cyp6aa1-2* and *Cyp6p1-5*) and 16 around *Cyp9k1*. For the *Cyp6aa/p* cluster, these independent  
255 CNVs were primarily found in *An. coluzzii* from Burkina Faso, Côte d'Ivoire and Ghana. In *Cyp9k1*,  
256 CNVs were primarily found in *An. gambiae* from Burkina Faso and Ghana and Guinea.

257 All but one of the eleven CNV alleles in the *Gstu/e* cluster included *Gste2*, indicating that this is the  
258 major target of gene amplification in this cluster. Given the body of evidence linking *Gste2* to DDT  
259 and pyrethroid resistance across multiple species (*An. gambiae*: [28], *An. funestus*: [41], *Aedes*  
260 *aegypti*: [49]), the focus of amplifications on this gene is likely to be linked to its importance in  
261 resistance.

262 Interestingly, the *Gstue\_Dup1* duplication in Burkina Faso occurs on the background of the  
263 *Gste2\_114T* SNP, associated with DDT resistance in *An. gambiae* [28]. The duplication may  
264 therefore serve to increase the dosage of *Gste2*, whose detoxifying activity has already been  
265 elevated by the 114T mutation. Alternatively, the role of *Gstue\_Dup1* may be to compensate for any  
266 negative fitness effects of 114T. Whilst impaired *Gste2* activity may be compensated by increasing  
267 the expression of the gene, *Gstue\_Dup1* is homogeneous for 114T, excluding the possibility of  
268 compensation by pairing of mutant and wild-type alleles as found in heterogeneous *Ace-1*  
269 duplications [6].

270 Unexpectedly, in the *Cyp6aa/P* cluster, only five of the 15 CNVs included *Cyp6p3*, and these were  
271 only found at appreciable frequency in *An. coluzzii* from Côte d'Ivoire. In contrast, 13 of the 15  
272 CNVs included *Cyp6aa1*, with high CNV frequencies found in *An. coluzzii* from Burkina Faso,  
273 Côte d'Ivoire and Guinea, and in *An. gambiae* from Uganda. Furthermore, the five high frequency  
274 CNVs that include *Cyp6aa1* (*Cyp6aap\_Dup1*, *Cyp6aap\_Dup7*, *Cyp6aap\_Dup10*, *Cyp6aap\_Dup14*,  
275 *Cyp6aap\_Dup15*) all show evidence of positive selection. While *Cyp6aa1* has received substantially  
276 less attention than *Cyp6p3*, it has previously been implicated in insecticide resistance. Expression of  
277 *Cyp6aa1* is higher in populations of *An. gambiae* and *An. coluzzii* that are resistance to pyrethroids  
278 and DDT compared to susceptible laboratory colonies [43,48]. There is also strong evidence for a  
279 link between *Cyp6aa1* and insecticide resistance in two congeneric species. In *An. funestus*  
280 expression of *Cyp6aa1* is higher in mosquitoes that have survived permethrin exposure compared to  
281 a susceptible strain [50,51], and the protein has been shown to metabolise pyrethroids and drive  
282 resistance when expressed in *Drosophila* [50]. In *An. minimus*, the ortholog of *Cyp6aa1* is up-  
283 regulated as a result of selection for resistance to deltamethrin [52], and the protein has been shown  
284 to metabolise pyrethroids [53]. The ability of *An. gambiae* *Cyp6aa1* to metabolise insecticides has  
285 not been tested empirically, although theoretical modelling suggests that it should effectively bind  
286 to permethrin and deltamethrin [50]. The high frequency of amplifications in *Cyp6aa1* and the  
287 signals of selection associated with them suggest that the importance of this gene for insecticide  
288 resistance in *An. gambiae* and *An. coluzzii* has been under-appreciated.

289 In conclusion, our results show a key role for CNVs in the adaptive response to strong and  
290 evolutionary recent selective pressure. In populations of *Anopheles* mosquitoes across Africa, genes  
291 involved in metabolic resistance to insecticides have been duplicated and these duplications have  
292 been driven to high frequencies by positive selection. These results highlight CNVs as a form of  
293 variation that can act as a front-line response to selective pressures requiring changes in expression  
294 levels, perhaps because low-copy-number whole-gene amplifications have relatively little negative  
295 effect on fitness and can thus exist in the standing genetic variation of a population without being

296 removed by purifying selection. Our findings also highlight *Cyp6aa1* as a gene that should be more  
297 closely investigated for its importance in *An. gambiae*, having been so far overlooked in preference  
298 to its genomic neighbour *Cyp6p3*. More broadly, the focus on SNPs in *An. gambiae* insecticide  
299 resistance research has allowed the emergence and selective spread of copy number mutations in  
300 key insecticide resistance genes to go unnoticed. Our findings demonstrate the importance of  
301 surveillance and investigation of CNVs in these genes. To this end, the breakpoint descriptions  
302 provided in our study will allow these CNVs to be screened and monitored in mosquito populations,  
303 allowing the spread of these mutations to be tracked and providing the groundwork for future  
304 studies investigating their resistance profile.

## 305 **4 Methods**

### 306 **4.1 Population sampling and whole genome sequencing**

307 We analysed data from 1,142 individual wild-caught specimens of *An. gambiae* and *An. coluzzii*  
308 collected and sequenced in phase 2 of Ag1000G [13]. The specimens were collected from sites in  
309 13 African countries (Angola *An. coluzzii* n = 78, Burkina Faso *An. coluzzii* n = 75, Burkina Faso  
310 *An. gambiae* n=92, Cameroon *An. gambiae* n = 297, Côte d'Ivoire *An. coluzzii* n = 71, Equatorial  
311 Guinea (Bioko) *An. gambiae* n = 9, Gabon *An. gambiae* n = 69, Ghana *An. coluzzii* n = 55; Ghana  
312 *An. gambiae* n = 12, Guinea *An. coluzzii* n = 4, Guinea *An. gambiae* n = 40, Guinea-Bissau (mixed  
313 ancestry) n = 91, Kenya (undetermined ancestry) n = 48, Mayotte *An. gambiae* n = 24, The Gambia  
314 (mixed ancestry) n = 65, Uganda *An. gambiae* n = 112). Individual specimens were sequenced using  
315 the Illumina Hi-Seq platform to obtain 100 bp paired-end reads with a target coverage of 30X.  
316 Further details of population sampling, sample preparation, sequencing, alignment, species  
317 identification and data production are reported elsewhere [36]

### 318 **4.2 Calculation and normalisation of coverage**

319 For each individual, we used the *pysam* software package ([https://github.com/pysam-](https://github.com/pysam-developers/pysam)  
320 [developers/pysam](https://github.com/pysam-developers/pysam)) to count the number of aligned reads (coverage) in non-overlapping 300 bp  
321 windows over the nuclear genome. The position of each read was considered to be its alignment  
322 start point, thus each read was only counted once. Sequencing coverage can be biased by variation  
323 in local nucleotide composition. To account for this, we computed a normalised coverage from the  
324 read counts based on the expected coverage of each window given its GC content [54]. For each  
325 300 bp window we computed the percentage of (G+C) nucleotides to the nearest percentage point

326 within the reference sequence and then divided the read counts in each window by the mean read  
327 count over all autosomal windows with the same (G+C) percentage. To minimise the impact of  
328 copy number variation when calculating these normalising constants, we excluded windows from  
329 the calculation of mean read counts where previous analyses of genome accessibility have found  
330 evidence for excessively high or low coverage or ambiguous alignment (windows with <90%  
331 accessible bases according to the Ag1000G phase 2 genome accessibility map [13], referred to as  
332 “accessible windows”). The normalised coverage values were then multiplied by a factor of 2, so  
333 that genome regions with a normal diploid copy number should have an expected normalised  
334 coverage of 2.

335 Before examining the normalised coverage data for evidence of copy number variation, we applied  
336 two filters to exclude windows where coverage may be an unreliable indicator of copy number. The  
337 first filter removed windows where more than 2% of reads were aligned with mapping quality 0  
338 (Fig. S12), which indicates that a read is mapped ambiguously and could be mapped equally well to  
339 a different genomic location. This filter removed 159,587 (20.8%) of 768,225 windows. The second  
340 filter removed windows where the percentage (G+C) content was extreme and rarely represented  
341 within the accessible reference sequence (fewer than 100 accessible windows with the same (G+C)  
342 percentage) because the small number of windows makes the calculation of a (G+C) normalising  
343 constant unreliable. This filter removed 13,484 (2.2%) of the 608,638 remaining windows.  
344 Windows retained for analysis were referred to as “filtered windows”.

### 345 **4.3 Genome-wide copy number variation discovery**

346 To detect the most likely copy-number state (CNS) at each window in each individual, we applied a  
347 Gaussian Hidden Markov Model (HMM) to the individual’s normalised windowed coverage data,  
348 following a similar approach to [55] and [5] (see Supplementary Methods SM1 for details). Since  
349 we are primarily interested in amplifications rather than deletions, we obtained a raw set of CNV  
350 calls for each sample by locating contiguous runs of at least five windows with amplified CNS  
351 ( $CNS > 2$ , or  $CNS > 1$  for chromosome X in males).

### 352 **4.4 CNV filtering**

353 From the raw CNV call set, we created a quality-filtered list of CNV calls. We first removed  
354 samples with very high coverage variance, since high variance could lead to erratic CNV calls. We  
355 therefore removed 27 samples where the variance in normalised coverage was greater than 0.2 (Fig.  
356 S13), retaining 1,115 samples for further analysis.

357 We then applied two filters to the raw CNV calls from these 1,115 samples. For the first filter, we  
358 computed likelihoods for each raw CNV call for both the copy number state predicted by the HMM  
359 and for a null model of copy number = 2, and removed CNV calls where the likelihood ratio was <  
360 1000 (Supplementary Methods SM2). For the second filter, we removed CNVs with low population  
361 frequencies. To do this, the raw CNV calls needed to be matched so that the same CNV in different  
362 individuals could be identified. We classed any two CNVs as identical if the breakpoints predicted  
363 by their copy number state transitions were within one window of each-other. We then removed  
364 CNVs that were not found in at least 5% of individuals in at least one population (or at least 3  
365 individuals for populations smaller than 40).

## 366 **4.5 Discovery of gene duplications and gene enrichment** 367 **analysis**

368 To determine the genes contained within each CNV, we compared the start and end points of the  
369 CNVs to the start and end points of all genes listed in the AgamP4.2 gene annotations (*Anopheles-*  
370 *gambiae-PEST\_BASEFEATURES\_AgamP4.2.gff3*). The start / end points of each CNV were  
371 calculated as the median of the start / end points of all the raw CNV calls that were matched to it. To  
372 keep only genes for which good coverage data were available, we retained only genes containing at  
373 least 50% filtered windows. We classed a retained gene as copied by a CNV if all of the filtered  
374 windows within the gene were inside the CNV. We performed simulations to determine whether the  
375 CNVs that we detected contained more genes than expected by chance. For each run of the  
376 simulation, we randomly re-allocated the start positions of every detected CNV, keeping the number  
377 of filtered windows covered by the CNVs unchanged, and calculated the number of CNVs that  
378 included at least one gene. This simulation was run 10,000 times to obtain the distribution of the  
379 null model.

380 We identified genes that could potentially be involved in metabolic resistance through  
381 detoxification (“metabolic detox genes”) by finding genes whose annotations contained the terms  
382 “P450”, “glutathione S-transferase” or “carboxylesterase” in the AgamP4 transcript annotations  
383 (*Anopheles-gambiae-PEST\_TRANSCRIPTS\_AgamP4.2.fa*). We performed simulations to determine  
384 whether genes copied by CNVs were enriched for detox genes. For each run of the simulation, we  
385 randomly re-allocated the genes encompassed by each CNV, keeping the number of consecutive  
386 genes covered by each CNV unchanged, and calculated the number of CNVs that included at least  
387 one metabolic detox gene. This simulation was run 10,000 times to obtain the distribution of the  
388 null model.

389 GO term analysis of genes included in CNVs was performed using the *topGO* [56] package in R.  
390 False discovery rates were calculated from the *P*-values using the R package *fdrtool* [57].

## 391 **4.6 Identifying CNV alleles at candidate metabolic insecticide** 392 **resistance loci**

393 We characterised in detail the independent duplication events (CNV alleles) at five gene clusters of  
394 particular interest (*Cyp6aa1* – *Cyp6p2*, *Gstu4* – *Gste3*, *Cyp6m2* – *Cyp6m4*, *Cyp6z3* – *Cyp6z1*,  
395 *Cyp9k1*) using their unique patterns of discordant read pairs and reads crossing the CNV breakpoint  
396 (breakpoints reads, see Supplementary Methods SM3 and Fig. 5). We manually inspected the five  
397 regions of interest in all 1142 samples to identify patterns of discordant and breakpoint reads  
398 (“diagnostic reads”) consistently associated with changes in coverage (Supplementary Fig. S1-S4).  
399 The start and end point of each CNV allele could usually be precisely determined by the breakpoint  
400 reads, and was otherwise determined by discordant read pairs or the point of change in coverage  
401 (Supplementary Data S4-S7). Once the diagnostic reads were identified for a CNV allele, we  
402 recorded the presence of that allele in all samples with at least two supporting diagnostic reads.

## 403 **4.7 Detecting signals of selection on CNV alleles**

404 We used the phased haplotypes to calculate the pairwise shared haplotype length and the EHH for  
405 each CNV allele [58], using only SNPs from outside the region in which CNVs were found. EHH  
406 calculations were performed using the *scikit-allele* Python package [ref].

407 Haplotypes clusters in the *Cyp9k1* region were were obtained with *scikit-allele*, using the first 1000  
408 SNPs on the centromeric side of *Cyp9k1* (the telomeric side of this gene has low levels of  
409 accessibility). A distance matrix between haplotypes was computed using the proportion of  
410 accessible SNPs that differed between pairwise haplotype combinations. This was used to perform  
411 hierarchical clustering, with haplotype clusters defined using a cut-off of 0.001.

## 412 **4.8 Statistics**

413 Statistical analysis was performed in R [59]. Contingency tables were analysed with Fisher's exact  
414 test. Where the sample size was too large for the Fisher's exact test, *P* values were obtained using  
415 the “simulated.p.value” option with  $10^6$  replicates.

## 416 **4.9 Estimating allele-specific copy numbers and phasing CNV** 417 **genotypes onto the Ag1000G haplotype scaffolds**

418 To determine the allele-specific copy number in a sample, we estimated the change in coverage  
419 associated with each CNV allele (Supplementary Methods SM4 and Fig. S14). Thus, even when  
420 overlapping CNV alleles were present in a single sample, we were usually able to determine the  
421 number of copies of each allele.

422 For single-copy CNVs, it is possible to determine the genotype of a sample from the copy numbers  
423 (copy numbers of 1 indicate a heterozygote, copy numbers of 2 indicate a homozygote for the  
424 CNV). For higher-order CNVs, this is not possible because a heterozygote triplication cannot be  
425 distinguished from a homozygote duplication. We therefore applied two filters to retain only single-  
426 copy CNV alleles. The first filter removed CNV alleles where the allele-specific copy number was  
427 found to rise above 2 in the data (if only a single sample rose as high as 2.5, we assumed that this  
428 could be an error and classed it as 2). This filter removed five CNV alleles (Cyp6aap\_Dup11,  
429 Gstue\_Dup2, Gstue\_Dup8, Cyp9k1\_Dup11, Cyp9k1\_Dup15). For the second filter, we classed each  
430 sample as homozygote wild-type, heterozygote or homozygote CNV based on their copy numbers,  
431 and then removed CNV alleles that were inconsistent with Hardy-Weinberg expectations within the  
432 populations in which they were found. This filter removed four CNV alleles (Cyp6aap\_Dup4,  
433 Gstue\_Dup5, Gstue\_Dup7, Cyp9k1\_Dup10). Three CNV alleles (Cyp9k1\_Dup7, Cyp9k1\_Dup13  
434 and Cyp9k1\_Dup14) were also excluded because of difficulties in calling allele-specific copy  
435 number (Supplementary Data S7). In one case (Cyp6m2\_Dup1), all individuals were found to have  
436 a copy number of 2, indicating that the CNV is a triplication, with no duplications present in the  
437 population. This CNV was therefore retained, with all samples carrying the CNV classed as  
438 heterozygote.

439 CNV alleles that passed both filters were phased onto the Ag1000G phase 2 haplotype scaffolds  
440 using the *MVNCALL* software v1.0 [60], using default parameters apart from setting  $\lambda = 0.1$  to  
441 ensure that none of the input CNV genotype calls were changed during phasing. For each of the five  
442 gene clusters, phasing was performed using the 200 non-singleton SNPs either side of the region in  
443 which CNVs were found, thus avoiding the inclusion of SNPs found inside any of the CNVs.  
444 Haplotypes that contained more than one CNV allele were rare and therefore excluded from  
445 subsequent calculations of haplotype heterozygosity.

## 446 Acknowledgements

447 This work was supported by the Wellcome Trust (090770/Z/09/Z; 090532/Z/09/Z; 098051),  
448 Medical Research Council UK (MR/P02520X/1; MR/M006212/1) and the National Institute of  
449 Allergy and Infectious Diseases (NIAID. R01-AI116811). The content is solely the responsibility of  
450 the authors and does not necessarily represent the official views of the NIAID or NIH.

## 451 References

- 452 [1]Chen Z, Cheng C-HC, Zhang J, Cao L, Chen L, Zhou L, et al. Transcriptomic and genomic  
453 evolution under constant cold in Antarctic notothenioid fish. *Proceedings of the National Academy*  
454 *of Sciences*. 2008;105: 12944-12949.
- 455 [2]Emerson JJ, Cardoso-Moreira M, Borevitz JO, Long M. Natural selection shapes genome-wide  
456 patterns of copy-number polymorphism in *Drosophila melanogaster*. *Science*. 2008;320: 1629-  
457 1631.
- 458 [3]Redon R, Ishikawa S, Fitch KR, Feuk L, Perry GH, Andrews TD, et al. Global variation in copy  
459 number in the human genome. *Nature*. 2006;444: 444-454.
- 460 [4]Handsaker RE, Van Doren V, Berman JR, Genovese G, Kashin S, Boettger LM, et al. Large  
461 multiallelic copy number variations in humans. *Nature Genetics*. 2015;47: 296.
- 462 [5]Leffler EM, Band G, Busby GBJ, Kivinen K, Le QS, Clarke GM, et al. Resistance to malaria  
463 through structural variation of red blood cell invasion receptors. *Science*. 2017;356: eaam6393.
- 464 [6]Assogba BS, Djogbénou LS, Milesi P, Berthomieu A, Perez J, Ayala D, et al. An *ace-1* gene  
465 duplication resorbs the fitness cost associated with resistance in *Anopheles gambiae*, the main  
466 malaria mosquito. *Scientific Reports*. 2015;5: 14529.
- 467 [7]Labbé P, Berticat C, Berthomieu A, Unal S, Bernard C, Weill M, et al. Forty years of erratic  
468 insecticide resistance evolution in the mosquito *Culex pipiens*. *PLoS Genetics*. 2007;3: e205.
- 469 [8]Sudmant PH, Mallick S, Nelson BJ, Hormozdiari F, Krumm N, Huddleston J, et al. Global  
470 diversity, population stratification, and selection of human copy-number variation. *Science*.  
471 2015;349.
- 472 [9]Kiszewski A, Mellinger A, Spielman A, Malaney P, Sachs SE, Sachs J. A global index  
473 representing the stability of malaria transmission. *The American Journal of Tropical Medicine and*  
474 *Hygiene*. 2004;70: 486-498.
- 475 [10]Bass C, Field LM. Gene amplification and insecticide resistance. *Pest Management Science*.  
476 2011;67: 886-890.
- 477 [11]Weetman D, Djogbenou LS, Lucas E. Copy number variation (CNV) and insecticide resistance



- 478 in mosquitoes: Evolving knowledge or an evolving problem? *Current Opinion in Insect Science*.  
479 2018;27: 82-88.
- 480 [12]Donnelly MJ, Isaacs AT, Weetman D. Identification, validation, and application of molecular  
481 diagnostics for insecticide resistance in malaria vectors. *Trends in Parasitology*. 2016;32: 197-206.
- 482 [13]The *Anopheles gambiae* 1000 Genomes Consortium. Ag1000G phase 2 AR1 data release.  
483 MalariaGEN. <http://www.malariagen.net/data/ag1000g-phase2-ar1>. 2017.
- 484 [14]Liu N. Insecticide resistance in mosquitoes: impact, mechanisms, and research directions.  
485 *Annual Review of Entomology*. 2015;60: 537-559.
- 486 [15]Weetman D, Mitchell SN, Wilding CS, Birks DP, Yawson AE, Essandoh J, et al. Contemporary  
487 evolution of resistance at the major insecticide target site gene *Ace-1* by mutation and copy number  
488 variation in the malaria mosquito *Anopheles gambiae*. *Molecular Ecology*. 2015;24: 2656-2672.
- 489 [16]Martins AJ, Brito LP, Linss JGB, Rivas GB, Machado R, Bruno RV, et al. Evidence for gene  
490 duplication in the voltage-gated sodium channel gene of *Aedes aegypti*. *Evolution, Medicine, and*  
491 *Public Health*. 2013;2013: 148-160.
- 492 [17]Martins WFS, Subramaniam K, Steen K, Mawejje H, Liloglou T, Donnelly MJ, et al. Detection  
493 and quantitation of copy number variation in the voltage-gated sodium channel gene of the  
494 mosquito *Culex quinquefasciatus*. *Scientific Reports*. 2017;7: 5821.
- 495 [18]Remnant EJ, Good RT, Schmidt JM, Lumb C, Robin C, Daborn PJ, et al. Gene duplication in  
496 the major insecticide target site, *Rdl*, in *Drosophila melanogaster*. *Proceedings of the National*  
497 *Academy of Sciences*. 2013;110: 14705-14710.
- 498 [19]Assogba BS, Milesi P, Djogbénou LS, Berthomieu A, Makoundou P, Baba-Moussa LS, et al.  
499 The *ace-1* locus is amplified in all resistant *Anopheles gambiae* mosquitoes: fitness consequences of  
500 homogeneous and heterogeneous duplications. *PLoS Biology*. 2016;14: e2000618.
- 501 [20]Li X, Schuler MA, Berenbaum MR. Molecular mechanisms of metabolic resistance to synthetic  
502 and natural xenobiotics. *Annual Review of Entomology*. 2007;52: 231-253.
- 503 [21]Schmidt JM, Good RT, Appleton B, Sherrard J, Raymant GC, Bogwitz MR, et al. Copy number  
504 variation and transposable elements feature in recent, ongoing adaptation at the *Cyp6g1* locus. *PLoS*  
505 *Genetics*. 2010;6: e1000998.
- 506 [22]Itokawa K, Komagata O, Kasai S, Masada M, Tomita T. Cis-acting mutation and duplication:  
507 History of molecular evolution in a P450 haplotype responsible for insecticide resistance in *Culex*  
508 *quinquefasciatus*. *Insect Biochemistry and Molecular Biology*. 2011;41: 503-512.
- 509 [23]Raymond M, Berticat C, Weill M, Pasteur N, Chevillon C. Insecticide resistance in the  
510 mosquito *Culex pipiens*: what have we learned about adaptation? *Genetica*. 2001;112: 287-296.
- 511 [24]Grigoraki L, Lagnel J, Kioulos I, Kampouraki A, Morou E, Labbé P, et al. Transcriptome  
512 profiling and genetic study reveal amplified carboxylesterase genes implicated in temephos  
513 resistance, in the Asian Tiger Mosquito *Aedes albopictus*. *PLoS Neglected Tropical Diseases*.  
514 2015;9: e0003771.

- 515 [25]Devonshire AL, Field LM, Foster SP, Moores GD, Williamson MS, Blackman RL. The  
516 evolution of insecticide resistance in the peach--potato aphid, *Myzus persicae*. Philosophical  
517 Transactions of the Royal Society of London B: Biological Sciences. 1998;353: 1677-1684.
- 518 [26]Field LM, Blackman RL, Tyler-Smith C, Devonshire AL. Relationship between amount of  
519 esterase and gene copy number in insecticide-resistant *Myzus persicae* (Sulzer). Biochemical  
520 Journal. 1999;339: 737-742.
- 521 [27]Zimmer CT, Garrood WT, Singh KS, Randall E, Lueke B, Gutbrod O, et al.  
522 Neofunctionalization of duplicated P450 genes drives the evolution of insecticide resistance in the  
523 brown planthopper. Current Biology. 2018;28: 268 - 274.
- 524 [28]Mitchell SN, Rigden DJ, Dowd AJ, Lu F, Wilding CS, Weetman D, et al. Metabolic and target-  
525 site mechanisms combine to confer strong DDT resistance in *Anopheles gambiae*. PLoS One.  
526 2014;9: e92662.
- 527 [29]Edi CV, Djogbenou L, Jenkins AM, Regna K, Muskavitch MAT, Poupardin R, et al. CYP6  
528 P450 enzymes and ACE-1 duplication produce extreme and multiple insecticide resistance in the  
529 malaria mosquito *Anopheles gambiae*. PLoS Genetics. 2014;10: e1004236.
- 530 [30]Müller P, Warr E, Stevenson BJ, Pignatelli PM, Morgan JC, Steven A, et al. Field-caught  
531 permethrin-resistant *Anopheles gambiae* overexpress CYP6P3, a P450 that metabolises pyrethroids.  
532 PLoS Genetics. 2008;4: e1000286.
- 533 [31]Mitchell SN, Stevenson BJ, Müller P, Wilding CS, Egyir-Yawson A, Field SG, et al.  
534 Identification and validation of a gene causing cross-resistance between insecticide classes in  
535 *Anopheles gambiae* from Ghana. Proceedings of the National Academy of Sciences. 2012;109:  
536 6147-6152.
- 537 [32]Stevenson BJ, Bibby J, Pignatelli P, Muangnoicharoen S, O'Neill PM, Lian L, et al.  
538 Cytochrome P450 6M2 from the malaria vector *Anopheles gambiae* metabolizes pyrethroids:  
539 sequential metabolism of deltamethrin revealed. Insect Biochemistry and Molecular Biology.  
540 2011;41: 492-502.
- 541 [33]Chiu T, Wen Z, Rupasinghe SG, Schuler MA. Comparative molecular modeling of *Anopheles*  
542 *gambiae* CYP6Z1, a mosquito P450 capable of metabolizing DDT. Proceedings of the National  
543 Academy of Sciences. 2008;105: 8855-8860.
- 544 [34]Main BJ, Lee Y, Collier TC, Norris LC, Brisco K, Fofana A, et al. Complex genome evolution  
545 in *Anopheles coluzzii* associated with increased insecticide usage in Mali. Molecular Ecology.  
546 2015;24: 5145-5157.
- 547 [35]Vontas J, Grigoraki L, Morgan J, Tsakireli D, Fouseini G, Segura L, et al. Rapid selection of a  
548 pyrethroid metabolic enzyme CYP9K1 by operational malaria control activities. Proceedings of the  
549 National Academy of Sciences. 2018;115: 4619-4624.
- 550 [36]*Anopheles gambiae* 1000 Genomes Consortium. Genetic diversity of the African malaria vector  
551 *Anopheles gambiae*. Nature. 2017;552: 96-100.
- 552 [37]Schrider DR, Hahn MW, Begun DJ. Parallel evolution of copy-number variation across

- 553 continents in *Drosophila melanogaster*. *Molecular Biology and Evolution*. 2016;33: 1308-1316.
- 554 [38]Faucon F, Dusfour I, Gaude T, Navratil V, Boyer F, Chandre F, et al. Identifying genomic  
555 changes associated with insecticide resistance in the dengue mosquito *Aedes aegypti* by deep  
556 targeted sequencing. *Genome Research*. 2015;25: 1347-1359.
- 557 [39]David J, Strode C, Vontas J, Nikou D, Vaughan A, Pignatelli PM, et al. The *Anopheles gambiae*  
558 detoxification chip: a highly specific microarray to study metabolic-based insecticide resistance in  
559 malaria vectors. *Proceedings of the National Academy of Sciences of the United States of America*.  
560 2005;102: 4080-4084.
- 561 [40]Ding Y, Ortelli F, Rossiter LC, Hemingway J, Ranson H. The *Anopheles gambiae* glutathione  
562 transferase supergene family: annotation, phylogeny and expression profiles. *BMC genomics*.  
563 2003;4: 35.
- 564 [41]Riveron JM, Yunta C, Ibrahim SS, Djouaka R, Irving H, Menze BD, et al. A single mutation in  
565 the *GSTe2* gene allows tracking of metabolically based insecticide resistance in a major malaria  
566 vector. *Genome Biology*. 2014;15: R27.
- 567 [42]Djouaka RF, Bakare AA, Coulibaly ON, Akogbeto MC, Ranson H, Hemingway J, et al.  
568 Expression of the cytochrome P450s, CYP6P3 and CYP6M2 are significantly elevated in multiple  
569 pyrethroid resistant populations of *Anopheles gambiae* ss. from Southern Benin and Nigeria. *BMC*  
570 *genomics*. 2008;9: 538.
- 571 [43]Kwiatkowska RM, Platt N, Poupardin R, Irving H, Dabire RK, Mitchell S, et al. Dissecting the  
572 mechanisms responsible for the multiple insecticide resistance phenotype in *Anopheles gambiae* ss,  
573 M form, from Vallée du Kou, Burkina Faso. *Gene*. 2013;519: 98-106.
- 574 [44]Ngufor C, N'Guessan R, Fagbohoun J, Subramaniam K, Odjo A, Fongnikin A, et al. Insecticide  
575 resistance profile of *Anopheles gambiae* from a phase II field station in Cové, southern Benin:  
576 implications for the evaluation of novel vector control products. *Malaria Journal*. 2015;14: 464.
- 577 [45]Fossog Tene B, Poupardin R, Costantini C, Awono-Ambene P, Wondji CS, Ranson H, et al.  
578 Resistance to DDT in an urban setting: common mechanisms implicated in both M and S forms of  
579 *Anopheles gambiae* in the city of Yaoundé Cameroon. *PloS One*. 2013;8: e61408.
- 580 [46]Müller P, Donnelly MJ, Ranson H. Transcription profiling of a recently colonised pyrethroid  
581 resistant *Anopheles gambiae* strain from Ghana. *BMC genomics*. 2007;8: 36.
- 582 [47]Nikou D, Ranson H, Hemingway J. An adult-specific CYP6 P450 gene is overexpressed in a  
583 pyrethroid-resistant strain of the malaria vector, *Anopheles gambiae*. *Gene*. 2003;318: 91-102.
- 584 [48]Thomsen EK, Strode C, Hemmings K, Hughes AJ, Chanda E, Musapa M, et al. Underpinning  
585 sustainable vector control through informed insecticide resistance management. *PLoS One*. 2014;9:  
586 e99822.
- 587 [49]Lumjuan N, Rajatileka S, Changsom D, Wicheer J, Leelapat P, Prapanthadara L, et al. The role  
588 of the *Aedes aegypti* Epsilon glutathione transferases in conferring resistance to DDT and  
589 pyrethroid insecticides. *Insect Biochemistry and Molecular Biology*. 2011;41: 203-209.

- 590 [50]Ibrahim SS, Amvongo-Adjia N, Wondji MJ, Irving H, Riveron JM, Wondji CS. Pyrethroid  
591 resistance in the major malaria vector *Anopheles funestus* is exacerbated by overexpression and  
592 overactivity of the P450 *CYP6AA1* across Africa. *Genes*. 2018;9: 140.
- 593 [51]Riveron JM, Ibrahim SS, Chanda E, Mzilahowa T, Cuamba N, Irving H, et al. The highly  
594 polymorphic *CYP6M7* cytochrome P450 gene partners with the directionally selected *CYP6P9a*  
595 and *CYP6P9b* genes to expand the pyrethroid resistance front in the malaria vector *Anopheles*  
596 *funestus* in Africa. *BMC Genomics*. 2014;15: 817.
- 597 [52]Rodpradit P, Boonsuepsakul S, Chareonviriyaphap T, Bangs MJ, Rongnoparut P. Cytochrome  
598 P450 genes: molecular cloning and overexpression in a pyrethroid-resistant strain of *Anopheles*  
599 *minimus* mosquito. *Journal of the American Mosquito Control Association*. 2005;21: 71-79.
- 600 [53]Duangkaew P, Pethuan S, Kaewpa D, Boonsuepsakul S, Sarapusit S, Rongnoparut P.  
601 Characterization of mosquito *CYP6P7* and *CYP6AA3*: differences in substrate preference and  
602 kinetic properties. *Archives of Insect Biochemistry and Physiology*. 2011;76: 236-248.
- 603 [54]Abyzov A, Urban AE, Snyder M, Gerstein M. CNVnator: an approach to discover, genotype,  
604 and characterize typical and atypical CNVs from family and population genome sequencing.  
605 *Genome Research*. 2011;21: 974-984.
- 606 [55]Miles A, Iqbal Z, Vauterin P, Pearson R, Campino S, Theron M, et al. Indels, structural  
607 variation, and recombination drive genomic diversity in *Plasmodium falciparum*. *Genome*  
608 *rResearch*. 2016;26: 1288-1299.
- 609 [56]Alexa A, Rahnenfuhrer J. topGO: Enrichment analysis for Gene Ontology. R package version  
610 2.14.0. 2010.
- 611 [57]Klaus B, Strimmer K. fdrtool: Estimation of (local) false discovery rates and higher Criticism.  
612 R package version 1.2.15. 2015.
- 613 [58]Sabeti PC, Reich DE, Higgins JM, Levine HZP, Richter DJ, Schaffner SF, et al. Detecting  
614 recent positive selection in the human genome from haplotype structure. *Nature*. 2002;419: 832-  
615 837.
- 616 [59]R Development Core Team. R: A Language and Environment for Statistical Computing. 2008.
- 617 [60]Menelaou A, Marchini J. Genotype calling and phasing using next-generation sequencing reads  
618 and a haplotype scaffold. *Bioinformatics*. 2013;29: 84-91.

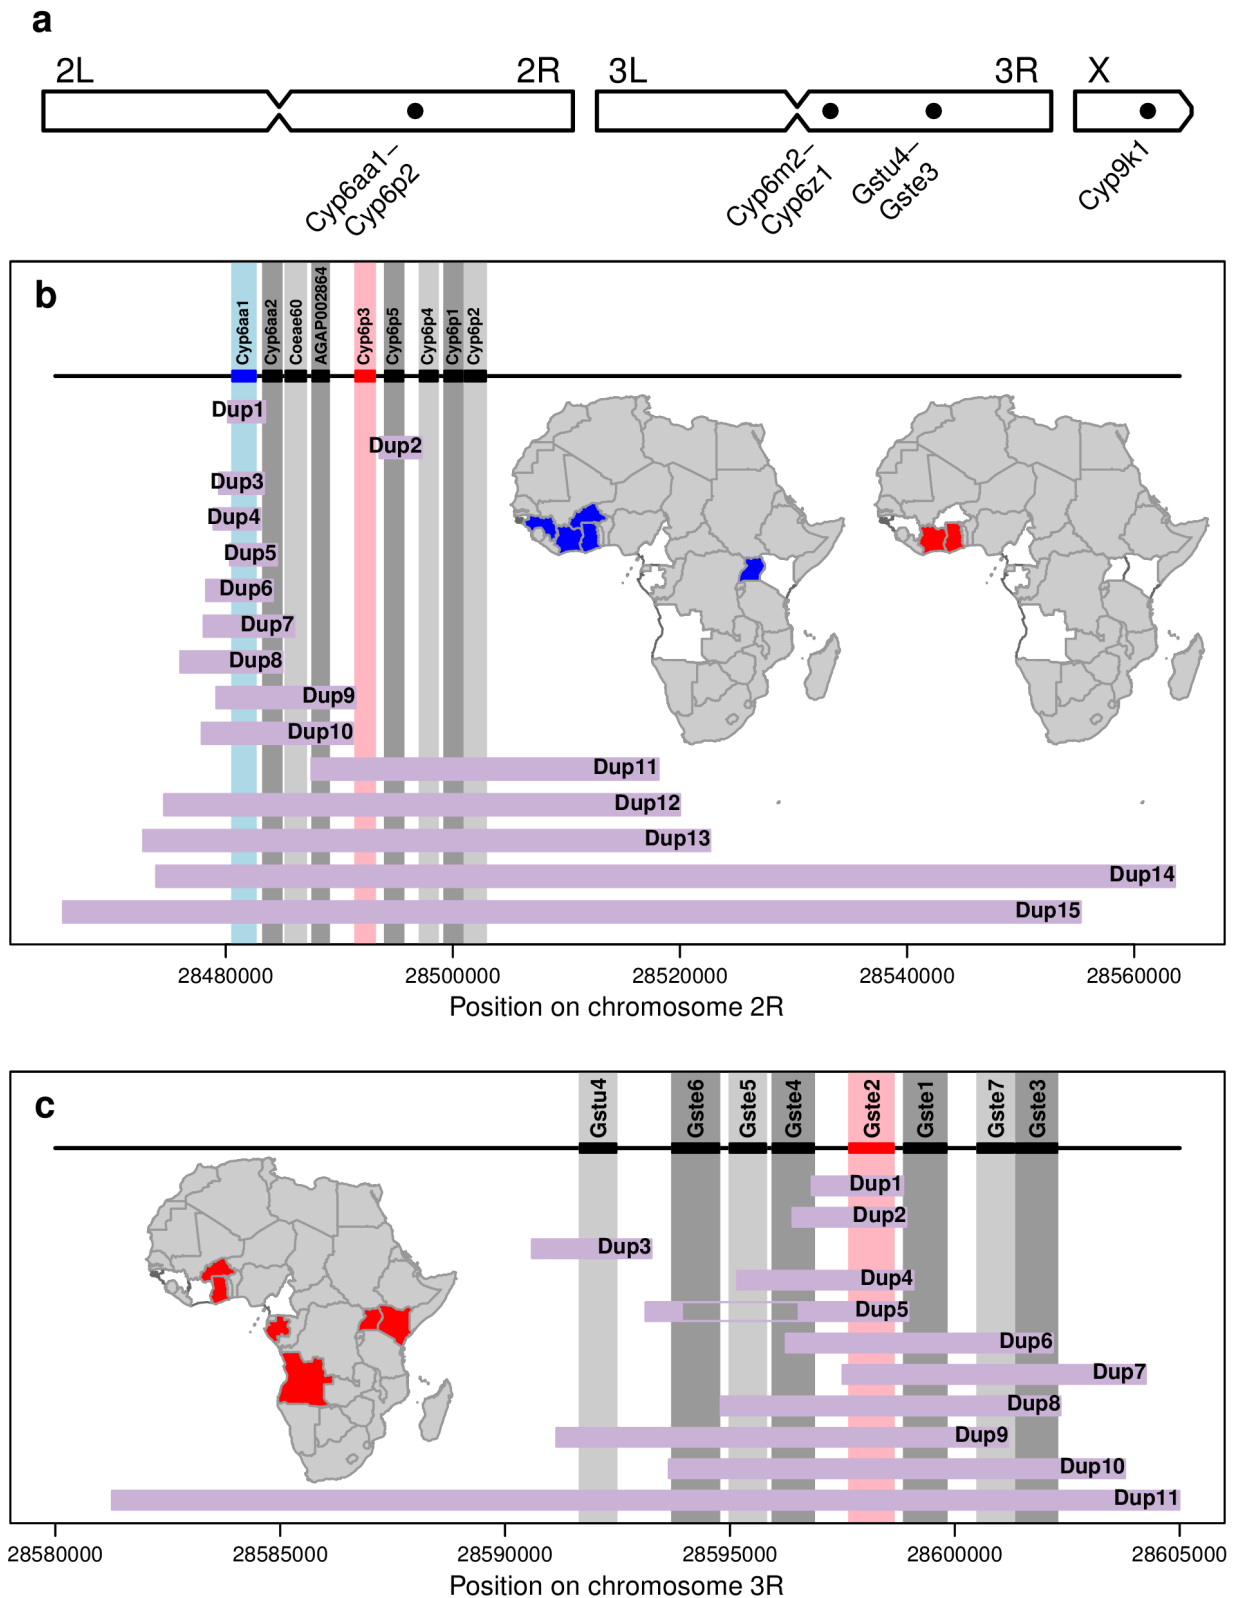

Figure 1: **(a)** CNVs in gene clusters known to be associated with metabolic insecticide resistance were found on all three chromosomes. Inset maps show countries in which at least 5% of individuals carried a CNV in *Cyp6aa1* (blue) and *Cyp6p3* (red), which countries absent from the data set shown in grey. **(b)** Of the 15 CNVs in *Cyp6aa1* - *Cyp6p2*, 13 include *Cyp6aa1* and 5 include *Cyp6p3*. **(c)** Of the 11 duplications in *Gstu4* - *Gste3*, 10 include *Gste2*. Inset map shows countries in which at least 5% of individuals carried a CNV in *Gste2* (red). Black rectangles and vertical grey bars show the positions of the genes in the cluster, with *Cyp6aa1*, *Cyp6p3* and *Gste2* highlighted in colour. Brown horizontal bars show the extent of each CNV, with the gap in *GstE4*\_Dup5 showing the deletion within this amplification. CNV names are abbreviated to Dup\* and refer to *Cyp6aa1*\_Dup\* and *GstE4*\_Dup\* in sub-plots **b** and **c** respectively. Further details on each of these CNVs, and of those from the other gene clusters, are presented in Supplementary Data S5-S8.

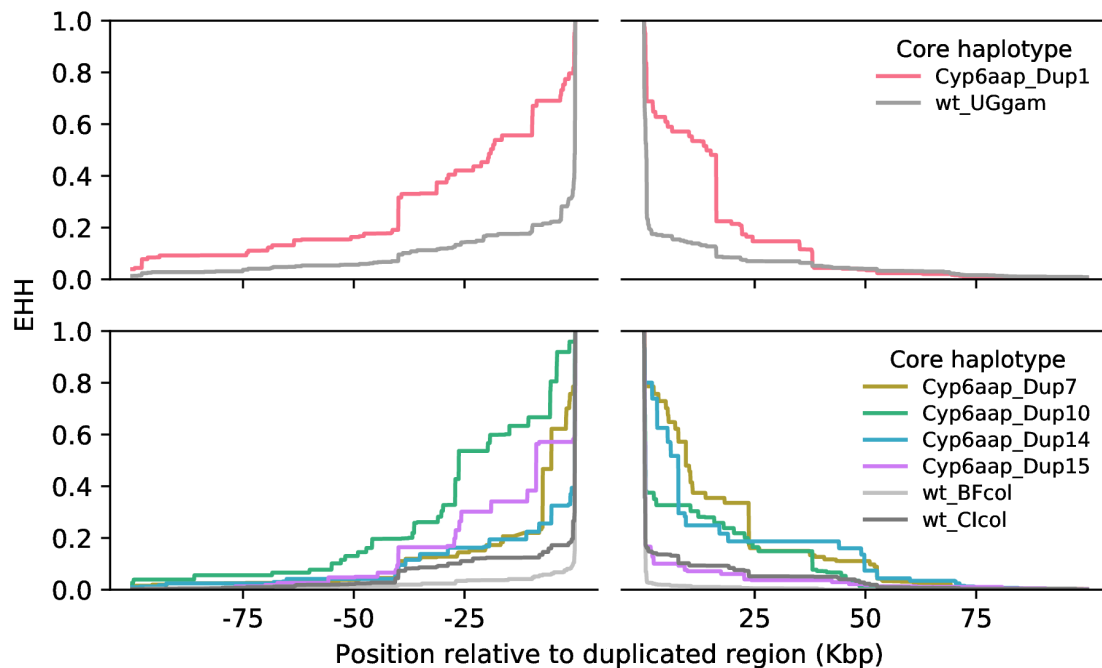

Figure 2: Evidence for prolonged linkage disequilibrium around CNVs in the *Cyp6aa1-Cyp6p2* gene cluster. Extended Haplotype Heterozygosity (EHH) decay was calculated around CNV and non-CNV (wt) haplotypes using SNPs from outside the region containing CNVs (break in the x axis). BF = Burkina Faso, CI = Côte d'Ivoire, UG = Uganda, col = *An. coluzzii*, gam = *An. gambiae*.

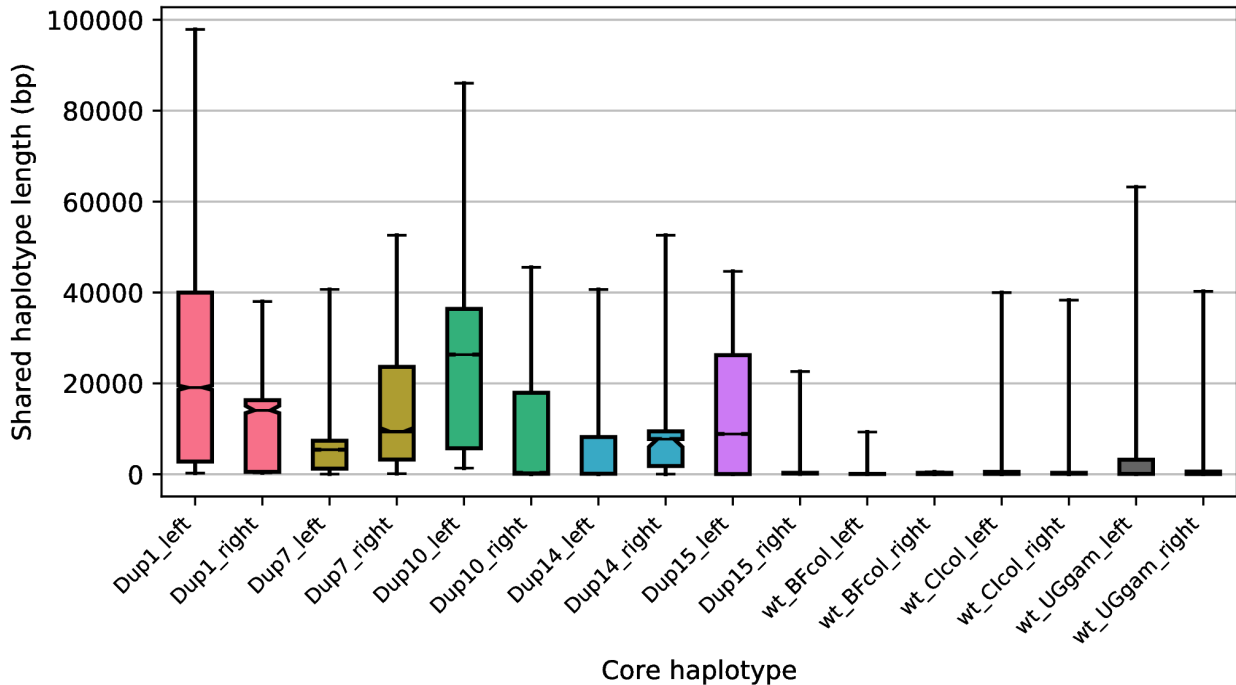

Figure 3: Lengths of pairwise shared haplotypes are greater between samples sharing a CNV allele than between wild-type samples. Shared haplotype lengths were calculated on either side of the CNV-containing region of the *Cyp6aa/p* gene cluster. Non-CNV (wt) samples were taken from the same populations as the focal CNV alleles. Bars show the distribution of shared haplotype lengths between all haplotype pairs with the same core haplotype. Bar limits show the inter-quartile range, fliers show the 5th and 95th percentiles, horizontal black lines show the median, notches in the bars show the bootstrapped 95% confidence interval for the median. The names of the CNVs (*Cyp6aa*\_Dup\*) are abbreviated as Dup\*. BF = Burkina Faso, CI = Côte d'Ivoire, UG = Uganda, col = *An. coluzzii*, gam = *An. gambiae*.

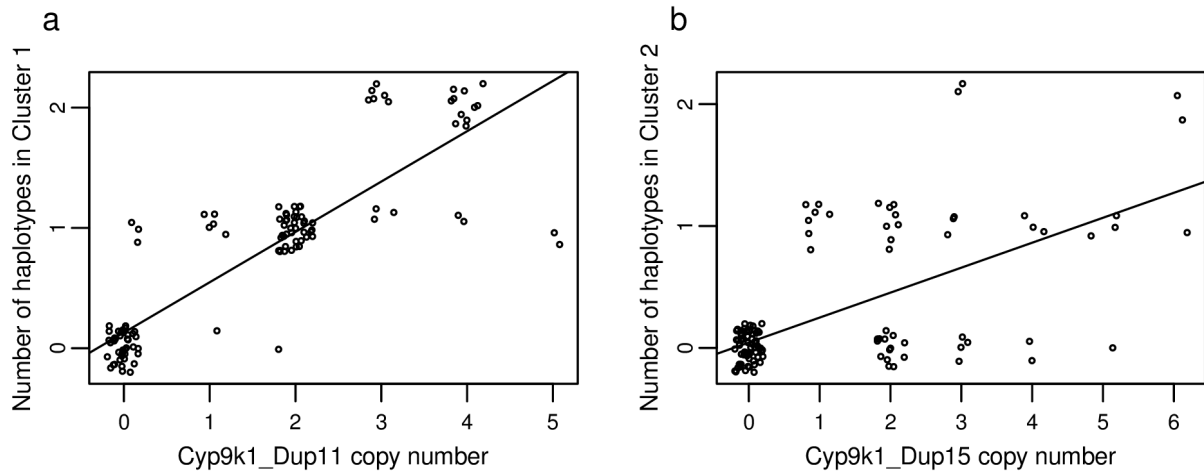

Figure 4: The two main haplotype clusters around *Cyp9k1* in Burkina Faso, Ghana and Guinea are associated with respective CNV alleles. Points are jittered to show overlapping data. Lines show least squares regression through the data. (a) Strong correlation between *Cyp9K1\_Dup11* and haplotype Cluster 1. Most of the points lie on a line of slope 0.5, indicating that *Cyp9k1\_Dup11* is found most frequently as a triplication (two extra copies per chromosome), although both lower and higher copy number versions of this CNV exist. (b) Weaker correlation between *Cyp9k1\_Dup15* and haplotype Cluster 2.



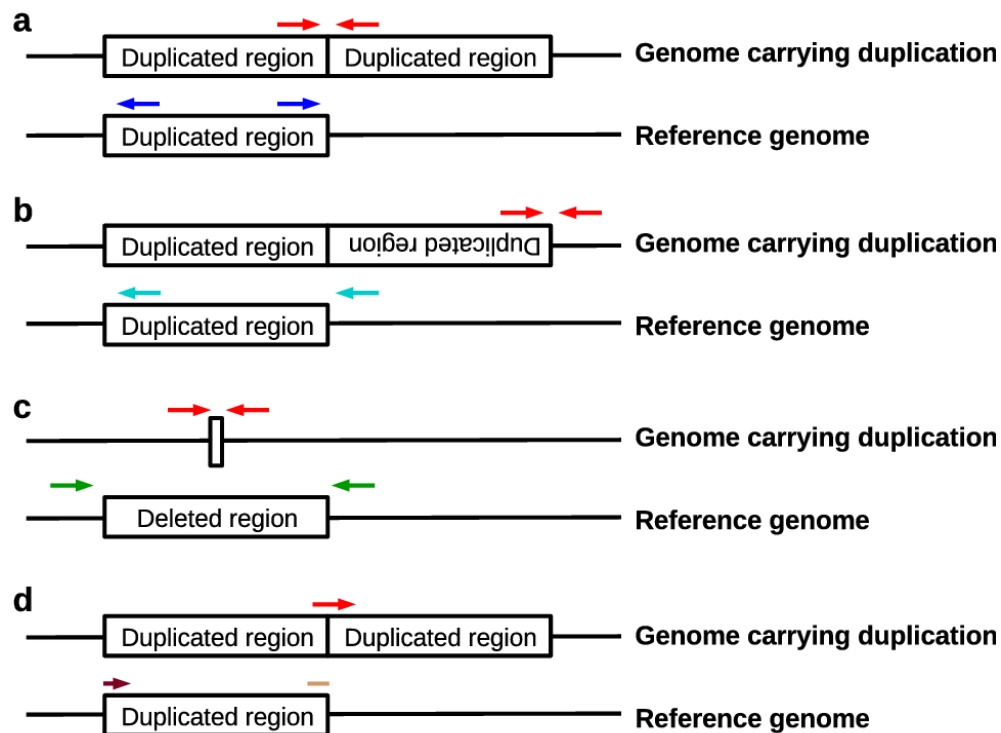

Figure 5: Three types of discordant read pairs (**a-c**) and breakpoint reads (**d**) were used to identify different CNV alleles. **a** In tandem duplications, read pairs derived from segments spanning the CNV breakpoint (red arrows) align facing away from each other around the breakpoint on the reference genome (dark blue arrows). **b** In tandem inversions, read pairs derived from segments spanning the end of the inverted segment (red arrows) align facing in the same direction as each other around the breakpoint on the reference genome (cyan arrows). **c** In deletions, read pairs derived from segments spanning the deleted sequence (red arrows) align in the correct orientation around the breakpoint, but farther apart than expected given the insert size of the sequencing library (green arrows). **d** In any of the above types of CNV (tandem duplication shown here as an example), reads crossing the breakpoint (red arrow) will only partially align on either side of the breakpoint. For the tandem duplication shown here, the start of the read (light brown start of an arrow) aligns at the end of the duplicated region, while the end of the read (dark brown end of an arrow) aligns at the start of the duplication.

Table 1: Number of CNVs detected either containing or not containing at least one cytochrome P450, glutathione-S-transferase or carboxylesterase (“detox genes”). AO = Angola, BF = Burkina Faso, CI = Côte d'Ivoire, CM = Cameroon, FR = French Mayotte, GA = Gabon, GH = Ghana, GM = The Gambia, GN = Guinea, GQ = Equatorial Guinea, GW = Guinea-Bissau, KE = Kenya, UG = Uganda. col = *An. coluzzii*, gam = *An. gambiae*. Numbers in brackets after the population name indicate the total number of samples from that population after removal of high-variance samples.

|                               | AOcol<br>(68) | BFcol<br>(75) | BFgam<br>(91) | CIcol<br>(71) | CMgam<br>(297) | FRgam<br>(23) | GAgam<br>(68) | GHcol<br>(55)  |
|-------------------------------|---------------|---------------|---------------|---------------|----------------|---------------|---------------|----------------|
| CNVs without detox genes      | 377           | 330           | 342           | 365           | 335            | 215           | 447           | 304            |
| CNVs with detox genes         | 4             | 5             | 5             | 7             | 1              | 0             | 1             | 2              |
| Percent CNVs with detox genes | 1             | 1.5           | 1.4           | 1.9           | 0.3            | 0             | 0.2           | 0.7            |
|                               | GHgam<br>(12) | GM<br>(65)    | GNcol<br>(4)  | GNgam<br>(38) | GQgam<br>(9)   | GW<br>(90)    | KE<br>(37)    | UGgam<br>(112) |
| CNVs without detox genes      | 114           | 388           | 26            | 251           | 111            | 375           | 276           | 336            |
| CNVs with detox genes         | 0             | 1             | 0             | 3             | 0              | 1             | 1             | 6              |
| Percent CNVs with detox genes | 0             | 0.3           | 0             | 1.2           | 0              | 0.3           | 0.4           | 1.8            |

Table 2: List of cytochrome P450s, glutathione-S-transferases and carboxylesterase genes found in duplicated regions. None were found on chromosome 3L.

| Chromosome 2L |            | Chromosome 2R |            | Chromosome 3R |            | Chromosome X |            |
|---------------|------------|---------------|------------|---------------|------------|--------------|------------|
| Gene ID       | Annotation | Gene ID       | Annotation | Gene ID       | Annotation | Gene ID      | Annotation |
| AGAP006724    | COEAE3G    | AGAP002862    | CYP6AA1    | AGAP008022    | CYP12F1    | AGAP000818   | CYP9K1     |
| AGAP006725    | COEAE3H    | AGAP013128    | CYP6AA2    | AGAP008212    | CYP6M2     |              |            |
| AGAP006726    | COEAE5G    | AGAP002863    | COEAE6O    | AGAP008219    | CYP6Z1     |              |            |
| AGAP006727    | COEAE6G    | AGAP002865    | CYP6P3     | AGAP009190    | GSTE8      |              |            |
| AGAP006728    | COEAE7G    | AGAP002866    | CYP6P5     | AGAP009191    | GSTE6      |              |            |
|               |            | AGAP002867    | CYP6P4     | AGAP009192    | GSTE5      |              |            |
|               |            | AGAP002868    | CYP6P1     | AGAP009193    | GSTE4      |              |            |
|               |            | AGAP002869    | CYP6P2     | AGAP009194    | GSTE2      |              |            |
|               |            | AGAP002870    | CYP6AD1    | AGAP009195    | GSTE1      |              |            |
|               |            | AGAP004165    | GSTD2      | AGAP009196    | GSTE7      |              |            |
|               |            |               |            | AGAP009197    | GSTE3      |              |            |
|               |            |               |            | AGAP009696    | CYP325C3   |              |            |

Table 3: Number (and proportion) of individuals with a CNV covering *Cyp6aa1*, *Cyp6p3*, *Gste2*, *Cyp6m2*, *Cyp6z1* or *Cyp9k1*. CNVs were identified using discordant and breakpoint reads. AO = Angola, BF = Burkina Faso, CI = Côte d'Ivoire, CM = Cameroon, FR = French Mayotte, GA = Gabon, GH = Ghana, GM = The Gambia, GN = Guinea, GQ = Equatorial Guinea, GW = Guinea-Bissau, KE = Kenya, UG = Uganda. col = *An. coluzzii*, gam = *An. gambiae*. Numbers in brackets after the population name indicate the total number of samples from that population. Proportions above 50% have been highlighted in bold.

|                | AOcol<br>(78) | BFcol<br>(75)     | BFgam<br>(92)     | CIcol<br>(71)     | CMgam<br>(297) | FRgam<br>(24) | GAgam<br>(69) | GHcol<br>(55) |
|----------------|---------------|-------------------|-------------------|-------------------|----------------|---------------|---------------|---------------|
| <i>Cyp6aa1</i> | 0             | <b>68 (90.7%)</b> | 3 (3.3%)          | <b>63 (88.7%)</b> | 2 (0.7%)       | 0             | 0             | 6 (10.9%)     |
| <i>Cyp6p3</i>  | 0             | 3 (4%)            | 0                 | <b>64 (90.1%)</b> | 0              | 0             | 0             | 3 (5.5%)      |
| <i>Gste2</i>   | 11 (14.1%)    | 18 (24%)          | 0                 | 0                 | 13 (4.4%)      | 0             | 9 (13%)       | 6 (10.9%)     |
| <i>Cyp6m2</i>  | 0             | 0                 | 0                 | 5 (7%)            | 0              | 0             | 0             | 0             |
| <i>Cyp6z1</i>  | 0             | 0                 | 15 (16.3%)        | 0                 | 0              | 0             | 0             | 0             |
| <i>Cyp9k1</i>  | 12 (15.4%)    | 1 (1.3%)          | <b>85 (92.4%)</b> | 0                 | 14 (4.7%)      | 0             | 0             | 3 (5.5%)      |

  

|                | GHgam<br>(12)  | GM<br>(65)        | GNcol<br>(4)   | GNgam<br>(40)   | GQgam<br>(9) | GW<br>(91) | KE<br>(48) | UGgam<br>(112)    |
|----------------|----------------|-------------------|----------------|-----------------|--------------|------------|------------|-------------------|
| <i>Cyp6aa1</i> | 0              | 0                 | <b>3 (75%)</b> | 1 (2.5%)        | 0            | 0          | 0          | <b>72 (64.3%)</b> |
| <i>Cyp6p3</i>  | 0              | 0                 | 0              | 0               | 0            | 0          | 0          | 1 (0.9%)          |
| <i>Gste2</i>   | 0              | 0                 | 0              | 0               | 0            | 0          | 23 (47.9%) | 19 (17%)          |
| <i>Cyp6m2</i>  | 0              | 0                 | 0              | 0               | 0            | 0          | 0          | 0                 |
| <i>Cyp6z1</i>  | 0              | 0                 | 0              | 5 (12.5%)       | 0            | 0          | 0          | 0                 |
| <i>Cyp9k1</i>  | <b>6 (50%)</b> | <b>38 (58.5%)</b> | 0              | <b>34 (85%)</b> | 0            | 10 (11%)   | 0          | 37 (33%)          |
